# Supplementary material for: The molecular and gene/miRNA expression profiles of radioiodine resistant papillary thyroid cancer
Source: Springer Nature journal article supplement (doi:10.1186/s13046-020-01757-x), 2020-11-16
Supplement: MOESM1 [file 18590604]

**Figure S1**

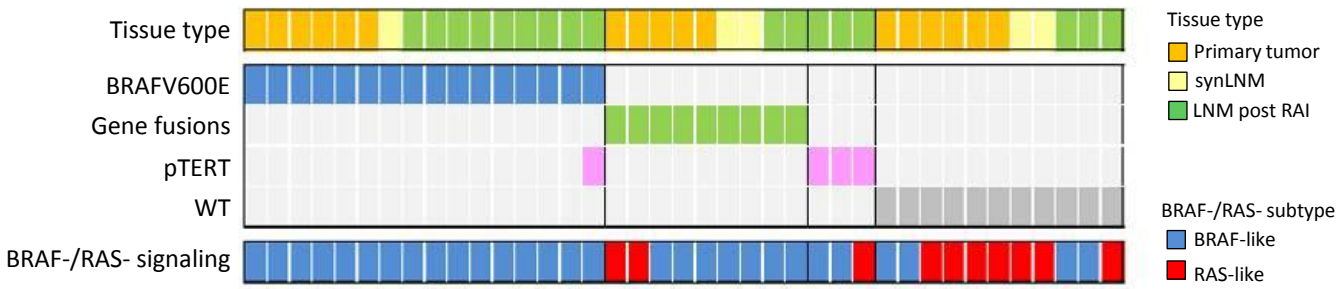

**Figure S1. Tumor samples driving lesion by PTC-MA and BRAF-/RAS-like subtype.**

Gene driver by PTC-MA and BRAF-/RAS-like subtype in the 39 tumor samples investigated by gene and miRNA microarrays. The BRAF- or RAS-like class was assigned based on the 71-gene signature derived from TCGA.

Abbreviation: LNM, lymph node metastasis; synLNM, synchronous lymph node metastasis

**Figure S2**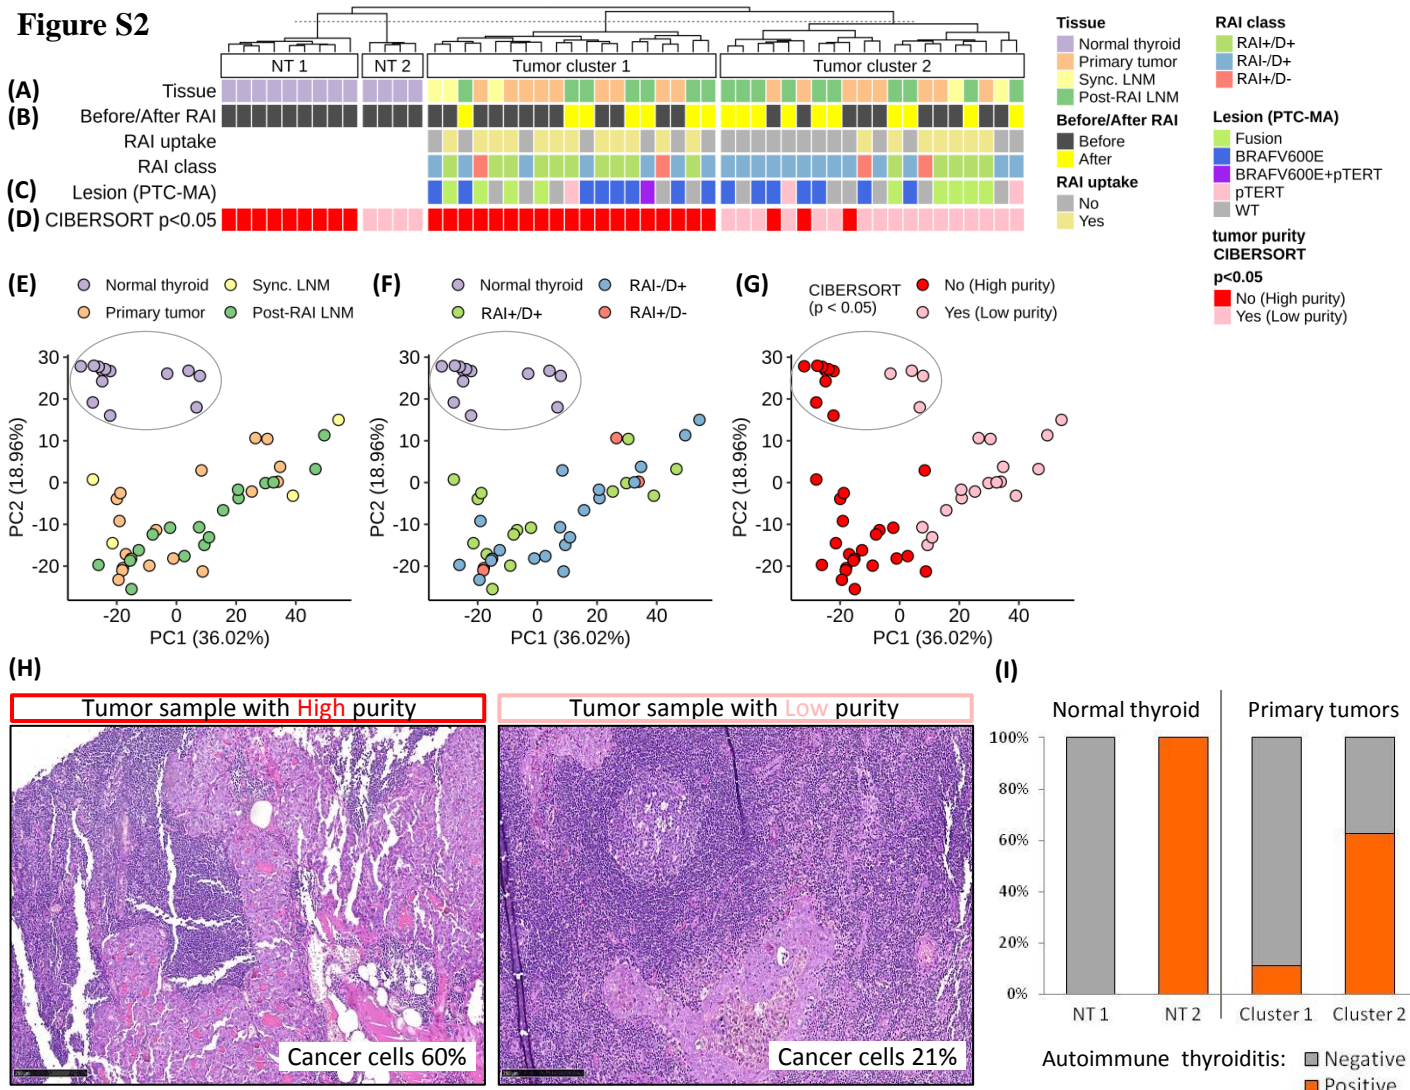**Figure S2. Gene expression in RAI-refractory and RAI-avid primary and LN metastatic PTCs.**

Unsupervised hierarchical clustering of the top most variable genes according to inter-quartile range; Euclidean distance and Ward linkage. Two major clusters were identified for tumor (Tumor cluster 1 and 2) and normal thyroid tissues (NT1 and 2). The following samples features are showed: **(A)** Tissue type; **(B)** Collection before and after RAI, RAI uptake and class; **(C)** Driving lesion by PTC-MA; **(D)** Tumor purity calculated by CIBERSORT algorithm; class attribution according to p-value (p-value < 0.05, low purity; p-value  $\geq$  0.05, high purity).

Principal component analysis (PCA) using the top most variable genes according to inter-quartile range. Specific samples features are showed separately: **(E)** Tissue type; **(F)** RAI class; **(G)** Tumor purity class by CIBERSORT. Normal thyroid group is highlighted by a circle.

**(H)** Hematoxylin and eosin sections of two representative tumor specimens included in Tumor cluster 1 and 2 displaying high and low tumor purity, respectively. The corresponding cancer cell percentage established by histological revision is indicated. Both tissues are derived from lymph node metastases. Scale bar 250 $\mu$ m. **(I)** Samples distribution based on the presence of autoimmune thyroiditis in high (NT1 and Cluster1) and low purity (NT2 and Cluster2) gene clusters reported in **(A)**.

Abbreviations: RAI, radioiodine; LNM, lymph node metastasis; synLNM, synchronous lymph node metastasis; RAI+/D+, RAI uptake at the metastatic site and disease persistence; RAI-/D+, no RAI uptake at the metastatic site and disease persistence; RAI+/D-, RAI uptake at the metastatic site and disease remission.

**Figure S3**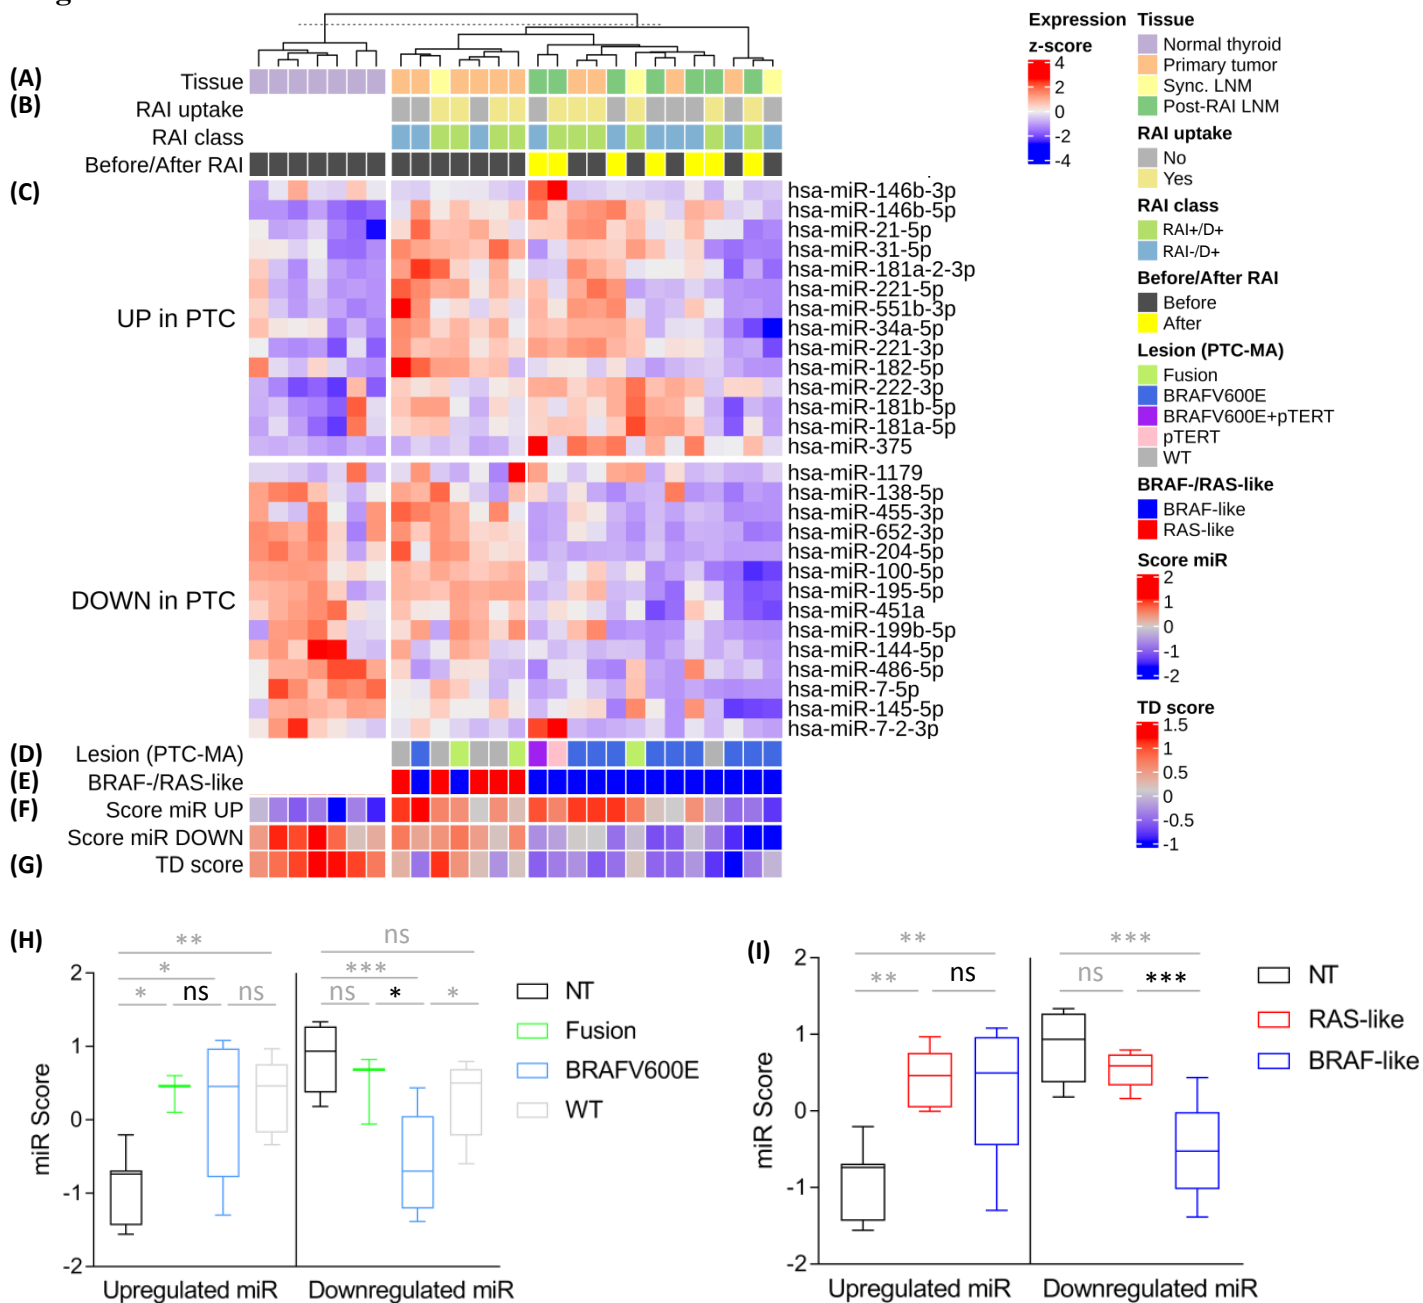**Figure S3. Expression of deregulated miRNAs in our series of RAI-refractory PTCs.**

Unsupervised hierarchical clustering of 28 miRNAs reported in literature as deregulated in PTC; miRNA profiles available for 27/29 samples. The following samples features are showed: **(A)** Tissue type; **(B)** RAI uptake, class and collection before and after RAI treatment; **(C)** miRNA expression, row Z-score; **(D)** Driving lesion by PTC-MA; **(E)** BRAF-/RAS-like subtype; **(F)** miRNA expression score calculated as mean of Log2-transformed and median-centered miR expression; separate scores were calculated for the showed UP- and DOWN-regulated miRNAs; **(G)** Thyroid differentiation (TD) score calculate based on the expression of 16 thyroid function related genes derived from TCGA.

miR score levels in samples stratified for: **(H)** Driving lesion; **(I)** BRAF-/RAS-like subtypes.

\* p-value < 0.05 ; \*\* p-value < 0.005 ; \*\*\* p-value < 0.0001 by Mann-Whitney test.

Abbreviation: RAI, radioiodine; LNM, lymph node metastasis; synLNM, synchronous lymph node metastasis; RAI+/D+, RAI uptake at the metastatic site and disease persistence; RAI-/D+, no RAI uptake at the metastatic site and disease persistence.

**Figure S4**

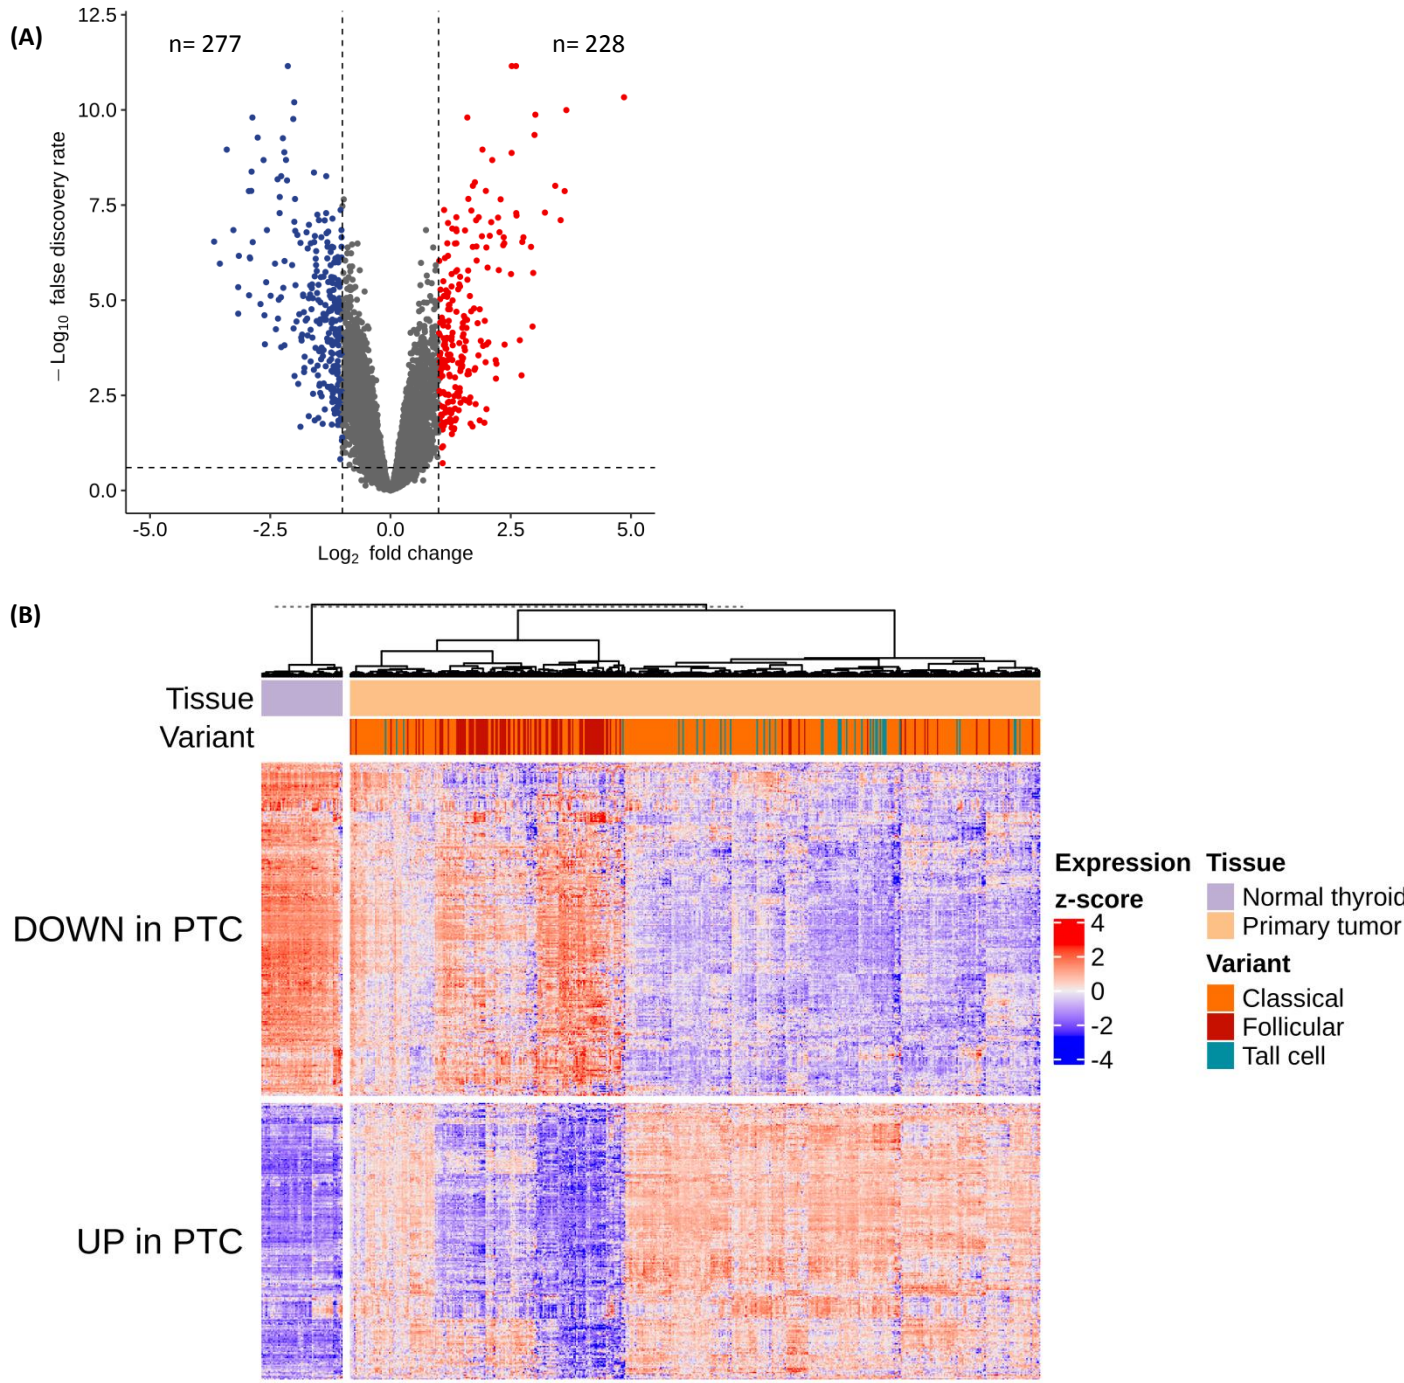

**Figure S4. Differentially expressed genes in our series of RAI-refractory PTCs.**

(A) Volcano plot of differentially expressed genes identified by class comparison in our sample series of 20 primary and metastatic RAI-refractory PTCs vs. 9 NTs; 505 genes were identified (FDR<0.05; absolute FC 2). Upregulated genes are shown in red, downregulated in blue. (B) Unsupervised hierarchical clustering of 494 primary PTCs and 58 NTs from TCGA study, using the list of 505 genes described in (A).

**Figure S5**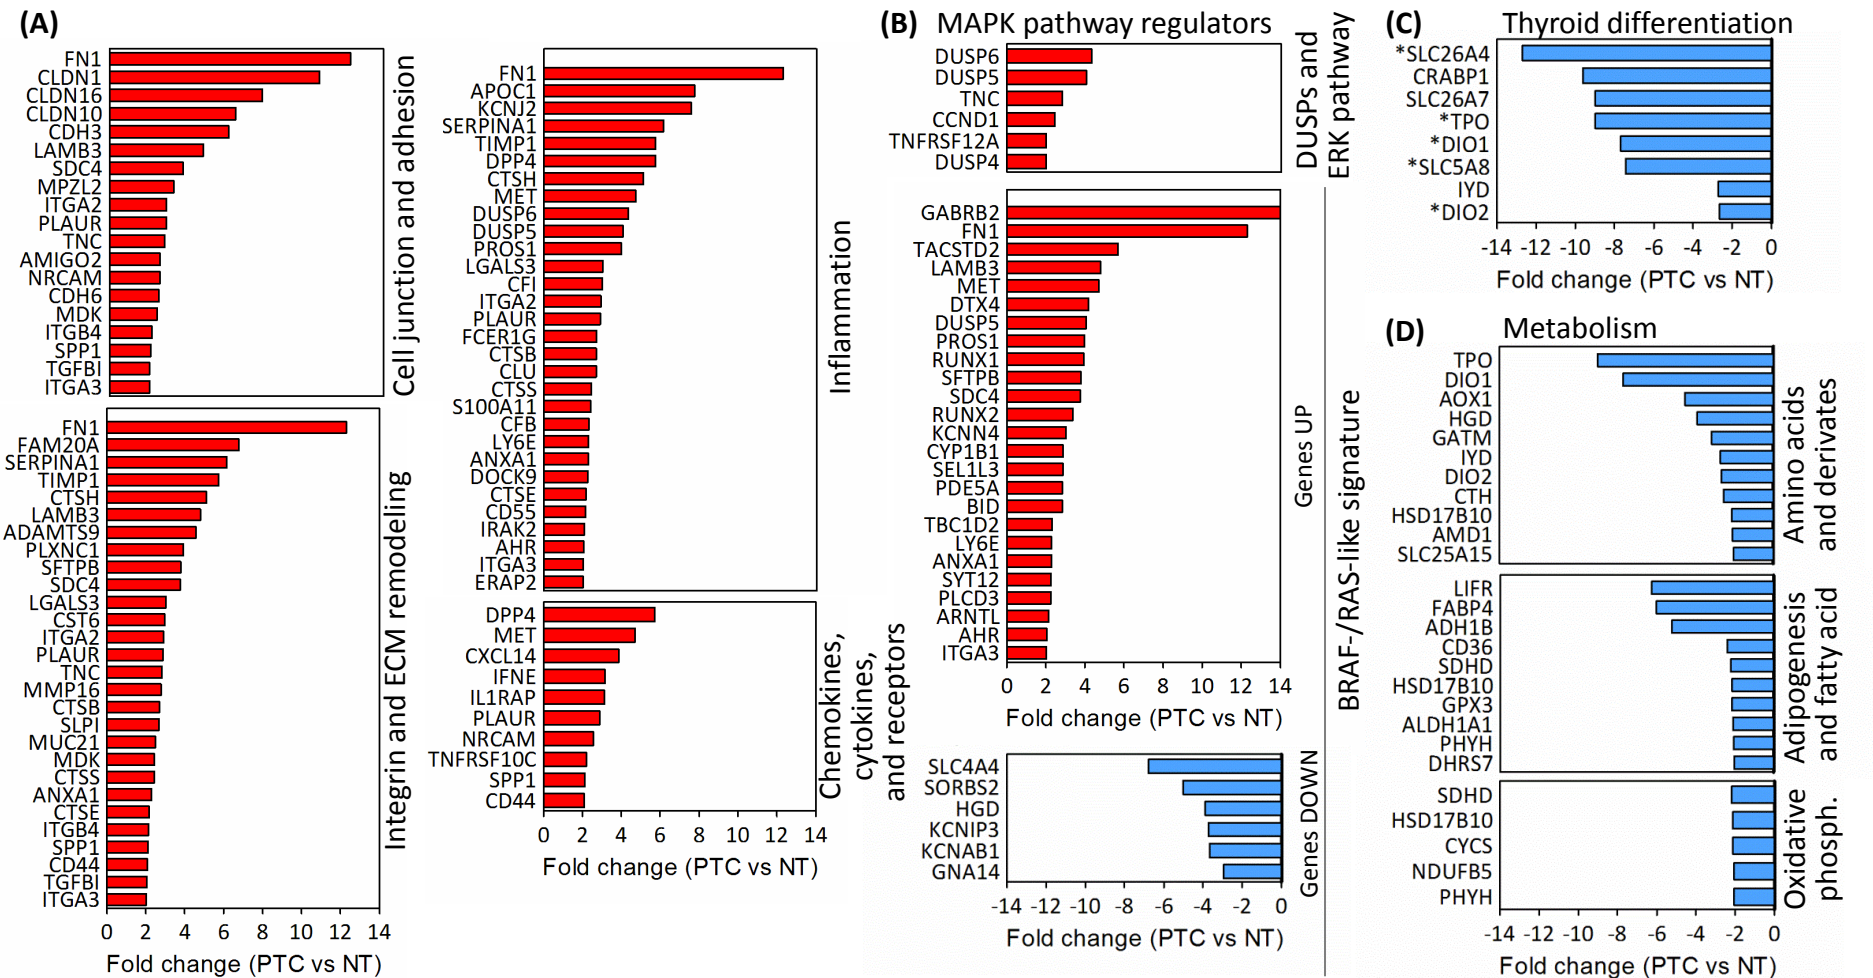**Figure S5. Expression of selected genes according to the most deregulated pathways identified in our series of RAI-refractory PTCs.**

Gene expression level is showed as Fold change of the class comparison PTCs (n=20) vs. NTs (n=9). Upregulated genes are showed in red, downregulated genes in blue. Gene pathways were derived from the top significant pathways (FDR <0.05) identified by gene set enrichment analyses using the gene set collections Hallmarks and C2 sub-collection Canonical pathways; additional manually curated gene sets (BRAF-/RAS-like signature and Thyroid Differentiation) were investigated. Only genes included in the set of 505 differentially expressed genes (FDR<0.05; absolute FC 2), are specifically represented.

Abbreviations: RAI, radioiodine; PTC, papillary thyroid carcinoma; NT, non-neoplastic thyroid; ECM, extracellular matrix; Phosph, phosphorylation. \* gene included in the Thyroid Differentiation score reported by TCGA (see Suppl. Figure 6)

**Figure S6**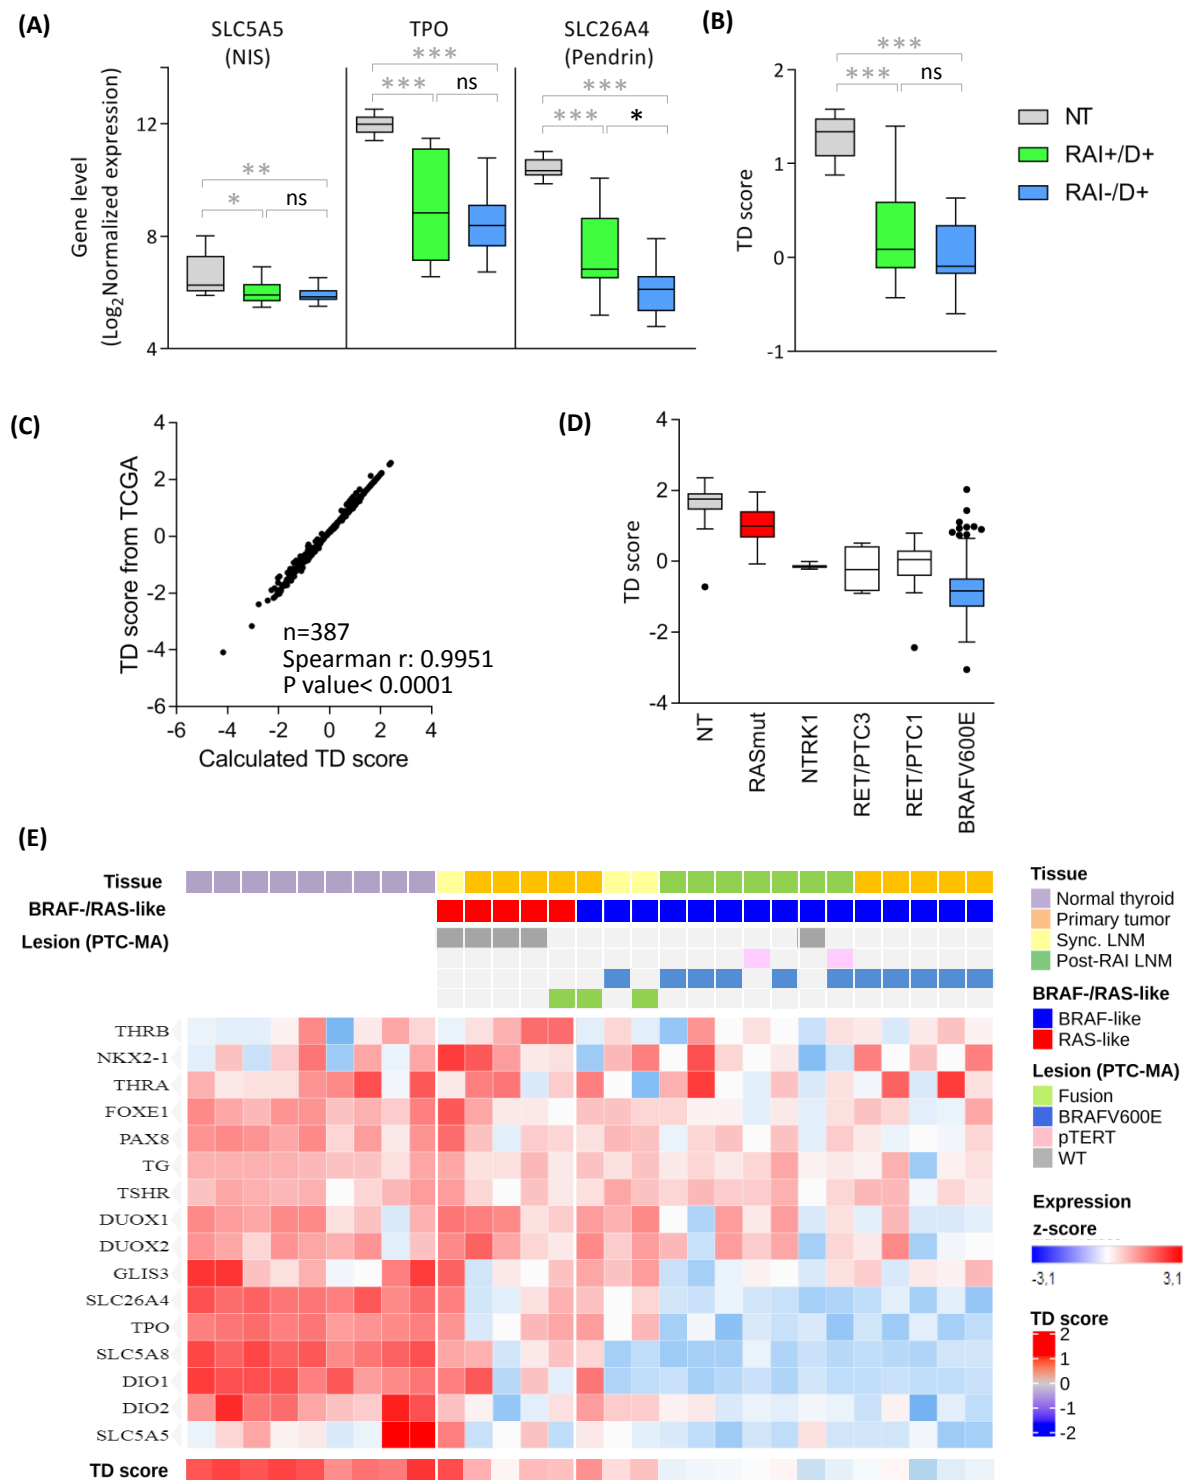**Figure S6. Thyroid differentiation (TD) genes expression.**

**(A)** Gene expression of 3 thyroid function related genes in our series of NTs and RAI-refractory PTCs stratified for RAI class. **(B)** TD score levels in samples reported in **(A)**. **(C)** Correlation between TD score reported in TCGA study and TD score recalculated in the present study for the same series of PTC. **(D)** Calculated TD score levels in PTC and NT samples from TCGA series; only PTC with the indicated driving lesions are showed from the whole series. **(E)** Heatmap showing the 16 TD genes expression and the corresponding calculated TD score in our series of NTs and RAI-refractory PTCs.

\* p-value < 0.05 ; \*\* p-value < 0.005 ; \*\*\* p-value < 0.0001 by Mann-Whitney test.
